# Supplementary material
Source: MDPI journal article supplement (https://www.mdpi.com/2311-7524/9/12/1315)
Supplement: s1 [file s1]

**Supplementary file S2.** *Xylella fastidiosa* multilocus sequence typing (MLST) and non-MLST sequences obtained in this study from the sequencing of the amplified DNA regions: *cysG*, *gltT*, *holC*, *leuA*, *malF*, *nuoL*, *petC* and *pilU*.

>OR209769 *Xylella fastidiosa* subsp. *pauca* isolate UNISAL-CS siroheme synthase (*cysG*) gene, *cysG*-24 allele, partial cds

```
GCTGAAGCAGTGCTGGAAGCAGCAGTAGCCGAGACTCCCCCACGGAGTCCGGCAGCGTCACCCTGGTGGGCG
CTGGCGCCGGCGACGCCGGGCTACTGACATTAAATGCACTGCGCGCCTTGAATGAAGCCGACATCATCTCTA
CGACCGCCTGGTCAGCGACACCGTGTTACAGATGGCACGGCGCGATGCGGAGCAGATCAAAGTAGGCAAATCC
GCGACGGGTACAGTCTGCGCCAAGAAGACATTACGCCCTGATGCTGCAACACGCCCGTGTGTCGAGCGTG
TCGTACGGTTGAAAGGTGGCGATCCATTCATCTTCGGTCGTGGCGGCGAGGAACTGGAATTCTTACGTACCCA
CAGCATCCCCATGAGGTCATCCCCGGAATCACCGCCGCCCTGGCCTGTGCCGCTATGCCGGTATCCCCCTTG
ACCCACCGCGACCATGCCCAATCGCTATGCCTGATCACCGCCCATTGCCAATCCTCCCTATACACCCTGGACT
GGGCTGCACTGGCACAAGAACGCCAAACATTGGCGTTCTACATGGGCGTGGCGGGGCTACCCACCATCCAGCA
ACGCCTGTGTGAGGCTG
```

>OR209770 *Xylella fastidiosa* subsp. *pauca* isolate UNISAL-CS proton/sodium-glutamate symport protein (*gltT*) gene, *gltT*-14 allele, partial cds

```
CGCTGGGACCTTTGGGATTAATCGCTACGTTGGTCGGTAGCTATGGTTTTTCAGAAAGTTGCTGCCGTTTGGTCA
CTTTGTATTGGCACTTTATTTGGCATGTGCGTTCCACATTGTGGTGGTGTACAGCGGGCTTCTGCTGGCACAT
GGTTTGAGTCCATTGAAGTTTTTTCAGGCGTGTGCGGCCAGGGATGCAGGTCGCTTTTGTTCAGTTCTTCCAGCT
TTGCTGCGATGCCAGTGGCATTACGCGCGATTACGCACAATCTGGGGGTTAACAAGGACTACGCTGCATTTGC
TGTGCCGCTGGGCAGTAGCATCAAAGTGGACGGTTGCGGGCGATCTTTCCAGC
```

>OR209771 *Xylella fastidiosa* subsp. *pauca* isolate UNISAL-CS DNA polymerase III holoenzyme, *chi* subunit (*holC*) gene, *holC*-10 allele, partial cds

```
ATGGCACGCGCCGACTTCTATTTGATTGCCAAACCGCGCTTTCTACAGCAACCACTGGAGTTGGTCTGCGCAT
TGGTCCGCAAAGCCTACGACACTAATCAGCCACGCTGATTCTGGCCCGCGACCAAGCCCAGGCCGAAGCACT
GGATGACCTACTGTGGGCGTTTCGACCCGGACGCCTACATCCCCACCAAATCGCCGGCAGCGACGAAGACGAC
GACATACCCCCGTATTGATTGCTACCCCGGACAGCGACACGCCATCGCGCCCGCTGGTCATCAACCTACGCG
ACGCCCTTGGGACGGCCCCCTGCGAACGCGTGTTGGAGGTGGTTCCCGCTGATCCCGCGGCACGCGAGCCACT
GCGTGAACGCTGGAACACTACAAGGCACGCGGCCTGCACATGAACAA
```

>OR209772 *Xylella fastidiosa* subsp. *pauca* isolate UNISAL-CS 2-isopropylmalate synthase (*leuA*) gene, *leuA*-7 allele, partial cds

```
TATTTGAAGAATTCAAACAGCTTTGTGAGAAACAGCGTTTGGTCACCGATGTGCGACCTGCAAGTGCTGATGCA
AGATAACAAGTACAGCATGGCTATCGCTTGGCCTCAATGACAATCAGTGATATTGGTAACCGGGCCAACGCA
CTGGTGGAATTGTCCGATCCCCAAGGTCAGCGTGTGGCCGAAACTGCGCAAGGCAACGGCCCAGTAGATGCAC
TGTTCCGAGCGCTGGCTGCAGCAACCGGGGTCAAACCTGGAGTTGGACAGCTATCAGGTACACAGTGTTGGTAT
```

>OR209773 *Xylella fastidiosa* subsp. *pauca* isolate UNISAL-CS ABC transporter sugar permease (*malF*) gene, *malF*-16 allele, partial cds

GAATACGACCTATTTTGTGCTGCTGGGGATGCCGATGTCGATTACGGTGTGCTGGGAGCTGCGTTGCTGCTG  
AATTCAAGAGCGGCGCGTTTTAAAGGGATTGTTTCGCACCGTGTTGTTTGCTCCGGTGGTGACGACGCTGGTTG  
CTGTCGCGTTGATTTGGCGTTATCTGTTTCACCTGAAGTATGGGGTGGTGAATTGGCTGCTGAATTGT

>OR209774 *Xylella fastidiosa* subsp. *pauca* Isolate UNISAL-CS NADH-  
ubiquinone oxidoreductase, NQO12 subunit (nuoL) gene, nuoL-16 allele,  
partial cds

AGTTTCTACAGCTTCCGCTTGTTGTTTCTGACCTTTCATGGTGAGGAGCGTTTCCGCCGTGTTGGAGGCGGAC  
ATGATGCTGCTGACCATGTAAATACACACACGTCAAATGATGACCATGCGCATGGTGTGCATGAGCCGCACGA  
ATCGCCATGGGTAGTGACATTGCCGCTAATTTTGTGCGCAATCCCTTCTATTGCGTTGGGCTTCTTCACGATT  
GGTCCGATGCTGTTTGGTACGGACTGGGCAGGCCATCATGCCGTTGAGGTGATCTGGGGTCAGACTGTCACAT  
TCTTTACAGGCATCATTGATTTTTATGATCCGGCGCAGGATACAGTTGCTGTTTTAGGTGAGGAATTCCGCGG  
CCCGGTGGCTTTTGCCTGTCATGGGATGATGTCGGCACCATTCTTTTTAACAGTTGTCGGGTTCCCTGCTTGCC  
GTGCTGTTGTATCTGTGGAAGCCGCAATGGCCAGTGAAAATGCGTGAAACCTTCTCGTTGCCGGTGCGTATTC  
TGGAGAACAAGTATGGTTTTGATGCGTTGTGGATCGGTGGT

>OR209775 *Xylella fastidiosa* subsp. *pauca* isolate UNISAL-CS ubiquinol  
cytochrome C oxidoreductase subunit C1 (petC) gene, petC-6 allele,  
partial cds

TCGCTGCTGATTTGGGTTTAAAGTGAAGTGCAGGTGATGAGTACTCTCAATGTCACCGGTGCCAAGTTTGGCGA  
TACGATCATGACAGCGATGCCGTTGACACCTCGGAGCAGTGGTTTGGTAAAATTCCGCCGGATTTGAGTTTG  
GTGGCCCGCGTCCGTGGGAGTGATTGGATCTACACTTATCTGAGGTCTTTCTACGTCGACTCGACTCGCCCGC  
TGGGTTGGAACAATCGACTGTTTGTCAATGTTTCTATGCCCAATCCACTGTCGCATCTCCAGGGTGTGCAGCG  
GGCAGAATATGGTGGGGCATCGCAGGCTGGTGTGATCGGTTAGTGACTGGGTTGGTTCCTGGTCCAGCCAGGT  
CAGCAGAACCCTGCTGAGTTTGACCGGACTCTGCGTGACATTGTCAATTTCTGCAATATGCCGCCGAGCCTG  
CGGCGTTACAACGGCATTCTTTGAGAGTATGGGTACTGTTGTTTCTACTGTTGTTGACTTTTTTTGGTTTCTCT  
ACTCAAG

>OR209776 *Xylella fastidiosa* subsp. *pauca* isolate=UNISAL-CS twitching  
motility protein (pilU) gene, partial cds

TGCGTACTCAAGAGACAATGGATCATGCCATCTCGTTCTCAGAAACCGGCCATCTGGTCATGTGTACCCTACA  
TGCCAACAACGCCAATCAAGCAATAGACCGCATTATTAATTCTTCCCGGAAGAGCGGCGCAGCCAATTACTG  
ACTGATCTGTCGCTGAATCTAAAAGGCATCATCGCTCAACAATTGATCCCATCTCCGGATGGTAAAGAGCGCT  
GTTTAGCAGCGGAAGTTTTGCGCGACAGTCGATTAGTACAGGACTACATACGCGTAGGCGAGATCCATAAGCT  
CAAAGAAGTCATGCAAAACCCCAACGATCTTGGAATGACTACATTGATCAAA
