# Supplementary material
Source: MDPI journal article supplement (https://www.mdpi.com/2311-7524/9/12/1315)
Supplement: s1 [file s1]

**Supplementary file S1.** Accession numbers of the *Xylella fastidiosa* multilocus sequence typing (MLST) sequences used to build the phylogenetic tree.

| host       | isolate   | subsp.                  |      | leuA       | petC       | lacF       | cysG       | holC       | nuoL       | glt        | Total Genome |
|------------|-----------|-------------------------|------|------------|------------|------------|------------|------------|------------|------------|--------------|
| Olive      | OL-G2     | <i>pauca</i> "De Donno" | ST53 | KJ406216   | KJ406222   | KJ406228   | KJ406252   | KJ406234   | KJ406240   | KJ406246   |              |
| Olive      | SALENTO-2 | <i>pauca</i> "De Donno" | ST53 |            |            |            |            |            |            |            | CP016610     |
| Almond     | ALM1      | <i>pauca</i> "De Donno" | ST53 | KJ406220   | KJ406226   | KJ406232   | KJ406256   | KJ406238   | KJ406244   | KJ406250   |              |
| Perwinkle  | PW1       | <i>pauca</i> "De Donno" | ST53 | KJ406221   | KJ406227   | KJ406233   | KJ406257   | KJ406239   | KJ406245   | KJ406251   |              |
| Olive      | KM13      | <i>pauca</i> "De Donno" | ST53 | KJ406218   | KJ406224   | KJ406230   | KJ406254   | KJ406236   | KJ406242   | KJ406248   |              |
| Olive      | Xf9       | <i>pauca</i> "De Donno" | ST53 | LM999929   | LM999927   | LM999933   | LM999934   | LM999925   | LM999932   | LM999930   |              |
| Olive      | Xf6       | <i>pauca</i> "De Donno" | ST53 | HG939499   | HG939497   | HG939503   | LM999935   | HG939495   | HG939502   | HG939500   |              |
| Oleander   | OLDR-1    | <i>pauca</i> "De Donno" | ST53 | KJ406219.1 | KJ406225.1 | KJ406231.1 | KJ406255.1 | KJ406237.1 | KJ406243.1 | KJ406249.1 |              |
| Olive      | Tr1       | <i>pauca</i> "De Donno" | ST53 | KJ406217.1 | KJ406223.1 | KJ406229.1 | KJ406253.1 | KJ406235.2 | KJ406241.1 | KJ406247.1 |              |
| Cherry     | Ch-1      | <i>pauca</i> "De Donno" | ST53 | KP208651   | KP208654   | KP208657   | KP208660   | KP208663   | KP208666   | KP208669   |              |
| Polygala   | PM-1      | <i>pauca</i> "De Donno" | ST53 | KP208652   | KP208655   | KP208658   | KP208661   | KP208664   | KP208667   | KP208670   |              |
| Westringia | WF-1      | <i>pauca</i> "De Donno" | ST53 | KP208653   | KP208656   | KP208659   | KP208662   | KP208665   | KP208668   | KP208671   |              |
| Pistachio  | A         | <i>pauca</i> "De Donno" | ST53 | MW940134   | MW940129   | MW940137   | MW940130   | MW940133   | MW940135   | MW940131   |              |
| Citrus     | 9a5c      | <i>pauca</i>            | ST13 |            |            |            |            |            |            |            | AE003849     |
| Citrus     | CVC0018   | <i>pauca</i>            | ST13 | FJ610159   | FJ610168   | FJ610176   | FJ610185   | FJ610197   | FJ610207   | FJ610217   |              |
| Caffee     | 5044483   | <i>pauca</i>            | ST53 | KX531034   | KX531035   | KX531036   | KX531037   | KX531038   | KX531039   | KX531040   |              |
| Oleander   | OLS0002   | <i>sandy</i>            | ST5  | FJ610157   | FJ610166   | FJ610173   | FJ610182   | FJ610194   | FJ610205   | FJ610214   |              |
| Grapewine  | Temecula1 | <i>fastidiosa</i>       | ST1  |            |            |            |            |            |            |            | AE009442     |
| Citrus     | M23       | <i>fastidiosa</i>       | ST1  |            |            |            |            |            |            |            | CP001011     |
| Grapevine  | GB514     | <i>fastidiosa</i>       | ST1  |            |            |            |            |            |            |            | CP002165     |
| Almond     | ALS-2     | <i>multiplex</i>        | ST6  | AY876765   | AY876890   | AY876740   | AY876665   | AY876715   | AY876790   | AY876690   |              |
| Almond     | Dixon     | <i>multiplex</i>        | ST6  | AY876763   | AY876888   | AY876738   | AY876663   | AY876713   | AY876788   | AY876688   |              |
| Peach      | 5R1       | <i>multiplex</i>        | ST10 | AY876772   | AY876897   | AY876747   | AY876672   | AY876722   | AY876797   | AY876697   |              |
